# Supplementary material
Source: PubMed Central journal article supplement (PMC2760463)
Supplement: dkp327_1.pdf [file dkp327_1.pdf]

## Supplementary data

**Figure S1.** Genotype analysis of the KPC-Kp isolates performed with the DiversiLab™ strain typing system (Bacterial BarCodes, bioMérieux). A related KPC-Kp strain was identified among the 50 isolates analysed. The eight isolates collected at the LTACH and FL-7 were related to KPC-Kp strains previously detected in the eastern USA.<sup>4</sup> The index *K. pneumoniae* (1534) identified in 1996 in North Carolina, FL-10 and FL-11 were not related to the main KPC-Kp cluster (genetic homology <90%). Results were interpreted using the modified Kullback-Leibler method.



**Table S1.** Clinical characteristics and outcomes of patients with ertapenem-resistant *K. pneumoniae* isolates from the South Florida LTACH

| Isolate | Age/<br>sex | Underlying<br>conditions <sup>a</sup>         | Previous use of<br>antibiotics (last<br>2 weeks) <sup>b</sup> | Charlson<br>weighted<br>index | Risk factors <sup>c</sup>                                        | Site of<br>infection/colonization <sup>d</sup> | Rectal<br>colonization | Empirical treatment<br>[agent (daily dose)] <sup>b</sup>                | Antimicrobial therapy administered after ID/AST |                                                                           |                       |                                                                | Treatment<br>outcome | Patient outcome and<br>comments <sup>a,b</sup>                                                  |
|---------|-------------|-----------------------------------------------|---------------------------------------------------------------|-------------------------------|------------------------------------------------------------------|------------------------------------------------|------------------------|-------------------------------------------------------------------------|-------------------------------------------------|---------------------------------------------------------------------------|-----------------------|----------------------------------------------------------------|----------------------|-------------------------------------------------------------------------------------------------|
|         |             |                                               |                                                               |                               |                                                                  |                                                |                        |                                                                         | agent <sup>b</sup>                              | timing from<br>infection onset                                            | duration<br>(days)    | daily dose                                                     |                      |                                                                                                 |
| #1      | 61/F        | CLD, CTD,<br>gastric ulcer,<br>DM2, CRF       | CIP                                                           | 4                             | Bc, CVC, Trac and MV                                             | UTI, BSI                                       | present                | FEP (1000 mg every 24 h), MEM (1000 mg every 8 h)                       | IMP<br>TIG                                      | 3 days after<br>4 days after                                              | 4<br>10               | 500 mg every 8 h<br>50 mg every 12 h                           | relapse              | alive and in LTACH at the end of study period; persistent urinary tract and rectal colonization |
| #2      | 59/F        | CLD, RF,<br>dementia                          | SAM, CIP,<br>TOB                                              | 2                             | Bc, CVC, Trac and MV                                             | UTI                                            | not tested             | SAM (3000 mg every 6 h), CIP (500 mg every 12 h), TOB (80 mg every 8 h) | FEP                                             | 5 days after                                                              | 1                     | unknown                                                        | failure              | died 1 day after starting definitive treatment with FEP                                         |
| #3      | 55/F        | CLD, CAD, HF,<br>CTD, DM2                     | FEP, ATM                                                      | 4                             | Bc, CVC, Trac and MV,<br>corticosteroids,<br>endoscopy, ICU stay | BSI                                            | not tested             | LEV (500 mg every 24 h)                                                 | IMP<br>SXT<br>COL                               | 3 days after<br>6 days after<br>5 days after                              | 2<br>1<br>10          | 500 mg every 6 h<br>160/800 mg every 12 h<br>150 mg every 12 h | failure              | died 18 days after onset of infection                                                           |
| #4      | 55/F        | CLD, DM2,<br>lung CA                          | CIP, TZP                                                      | 8                             | Bc, CVC,<br>corticosteroids                                      | UTI                                            | not tested             | FEP (1000 mg every 24 h)                                                | FEP                                             | 1 days after                                                              | 2                     | 1000 mg every 24 h                                             | failure              | died of lung CA and CAD 3 days after onset of urinary infection with KPC-Kp                     |
| #5      | 90/F        | CLD, MI,<br>dementia, NP,<br>DVT              | FEP, GEN, CFZ                                                 | 5                             | Bc, CVC, TPN, PEG<br>tube                                        | BSI                                            | not tested             | FEP (1000 mg every 12 h), GEN (120 mg every 12 h)                       | TIG<br>GEN                                      | 5 days after<br>4 days after                                              | 10<br>14              | 50 mg every 12 h<br>120 mg every 24 h                          | failure              | died of pancreatitis and polymicrobial sepsis 18 days after onset of illness with KPC-Kp        |
| #6      | 91/M        | CAD, MI, HF,<br>CRF, dementia,<br>prostate CA | IMP, MEM                                                      | 5                             | Bc, ICU stay                                                     | LRTI                                           | not tested             | IMP (500 mg every 8 h), FEP (unknown dose)                              | FEP<br>SAM<br>CFZ<br>AMX<br>GEN                 | first day<br>4 days after<br>4 days after<br>4 days after<br>6 days after | 8<br>2<br>1<br>5<br>1 | unknown<br>unknown<br>unknown<br>unknown<br>unknown            | not<br>assessable    | died of polymicrobial urosepsis, not involving KPC-Kp, 8 days after onset of illness            |

<sup>a</sup>CA, carcinoma; CAD, coronary artery disease; CLD, chronic lung disease; CRF, chronic renal failure; CTD, connective tissue disease; DM2, type II diabetes mellitus; DVT, deep vein thrombosis; HF, heart failure; MI, myocardial ischemia; NP, necrotizing pancreatitis; RF, respiratory failure.

<sup>b</sup>SAM, ampicillin/sulbactam; AMX, amoxicillin; ATM, aztreonam, CFZ, cefazolin; CIP, ciprofloxacin; COL, colistin; FEP, cefepime; GEN, gentamicin; IMP, imipenem; LEV, levofloxacin; MEM, meropenem; SXT, trimethoprim/sulfamethoxazole; TIG, tigecycline; TOB, tobramycin; TZP, piperacillin/tazobactam. Notably, only antimicrobial treatments for Gram-negative bacteria were taken into consideration.

<sup>c</sup>Bc, bladder catheter; CVC, central vascular catheter; ICU, intensive care unit; MV, mechanical ventilation; TPN, total parenteral nutrition; Trac, tracheostomy.

<sup>d</sup>UTI, urinary tract infection; BSI, bloodstream infection; LRTI, lower respiratory tract infection.
